# Supplementary material
Source: PubMed Central journal article supplement (PMC2596272)
Supplement: 0810308105_0810308105SI.pdf [file 0810308105_0810308105SI.pdf]

# Supporting Information

Kamoun et al. 10.1073/pnas.0810308105

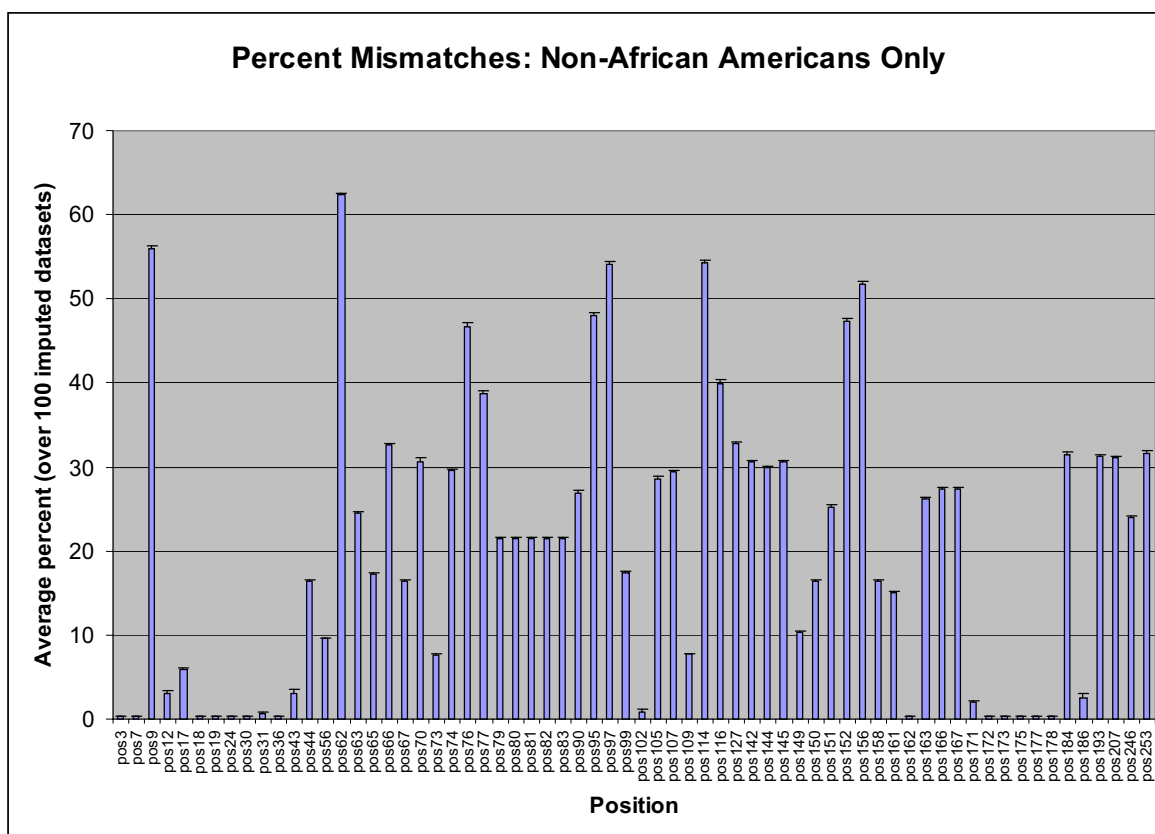

**Fig. S1.** This figure shows the mismatches at 66 variable amino acid sites covering the  $\alpha 1$ ,  $\alpha 2$ , and  $\alpha 3$  domains of the HLA-A molecule, expressed as an average percent over the 100 imputed dataset. Error bars indicate standard deviation.





**Table S1. Recipient and Donor Characteristics**

|                        | Overall % <i>n</i> = 705 | Non-AA % <i>n</i> = 498 | AA % <i>n</i> = 207 | <i>P</i> -value* |
|------------------------|--------------------------|-------------------------|---------------------|------------------|
| Age                    |                          |                         |                     | 0.1845           |
| <40                    | 27.38                    | 28.93                   | 23.59               |                  |
| 40–50                  | 24.11                    | 23.90                   | 24.62               |                  |
| 50–60                  | 27.68                    | 27.04                   | 29.23               |                  |
| 60+                    | 20.83                    | 20.13                   | 22.56               |                  |
| Gender                 |                          |                         |                     | 0.9713           |
| Male                   | 60.28                    | 60.24                   | 60.39               |                  |
| Female                 | 39.72                    | 39.76                   | 39.61               |                  |
| Delayed Graft Function |                          |                         |                     | <.0001           |
| Yes                    | 38.39                    | 32.37                   | 47.00               |                  |
| No                     | 61.61                    | 67.63                   | 53.00               |                  |
| Previous Transplant    |                          |                         |                     | 0.341            |
| Yes                    | 13.03                    | 13.81                   | 11.11               |                  |
| No                     | 86.97                    | 86.19                   | 88.89               |                  |
| ESRD Etiology          |                          |                         |                     | <.0001           |
| Glomerulonephritis     | 21.36                    | 24.10                   | 14.98               |                  |
| Hypertension           | 19.80                    | 12.25                   | 38.16               |                  |
| Other                  | 16.97                    | 18.07                   | 13.53               |                  |
| Polycystic Kidneys     | 10.89                    | 13.65                   | 4.35                |                  |
| Diabetes               | 30.98                    | 31.93                   | 28.99               |                  |
| Most Recent PRA        |                          |                         |                     | 0.4187           |
| 0                      | 78.92                    | 77.99                   | 81.08               |                  |
| 0–20                   | 9.64                     | 10.07                   | 8.65                |                  |
| 20+                    | 11.44                    | 11.94                   | 10.27               |                  |
| Donor Race             |                          |                         |                     | <.0001           |
| African-American       | 10.30                    | 7.11                    | 17.44               |                  |
| Non-African American   | 89.70                    | 92.89                   | 82.56               |                  |
| Donor Cause of Death   |                          |                         |                     | <.0001           |
| Cardiovascular         | 15.83                    | 12.41                   | 23.44               |                  |
| Intercranial           | 34.25                    | 33.02                   | 36.98               |                  |
| Trauma                 | 39.10                    | 44.96                   | 26.04               |                  |
| Other                  | 10.82                    | 9.60                    | 13.54               |                  |

\**P* value represents a comparison between Non-AA and AA recipients  
ESRD, end stage renal disease; PRA, panel reactive antibodies.

**Table S2. Correlation matrix between amino acid mismatched sites associated with delayed graft function in Caucasians recipients**

| Variable | MIS62 | MIS90 | MIS95 | MIS105 | MIS149 | MIS163 | MIS184 | MIS193 |
|----------|-------|-------|-------|--------|--------|--------|--------|--------|
| MIS62    |       |       |       |        |        |        |        |        |
| MIS90    | 0.23  |       |       |        |        |        |        |        |
| MIS95    | 0.72  | 0.19  |       |        |        |        |        |        |
| MIS105   | 0.24  | 0.81  | 0.23  |        |        |        |        |        |
| MIS149   | 0.23  | 0.35  | 0.01  | 0.27   |        |        |        |        |
| MIS163   | 0.23  | 0.96  | 0.19  | 0.80   | 0.34   |        |        |        |
| MIS184   | 0.50  | 0.11  | 0.39  | 0.11   | 0.08   | 0.13   |        |        |
| MIS193   | 0.45  | 0.15  | 0.35  | 0.16   | 0.05   | 0.16   | 0.83   |        |
| MIS246   | 0.25  | 0.13  | 0.04  | 0.21   | 0.46   | 0.14   | 0.14   | 0.20   |

MIS: designates a mismatch at an individual amino acid site. The numbers in the Table indicate the pair-wise correlation coefficient value between amino acid mismatched sites associated with DGF.

**Table S3. HLA-A Family-Specific Mismatched Sites**

|                | Position             | 127              | 149          | 184        | 193        | 246        |
|----------------|----------------------|------------------|--------------|------------|------------|------------|
|                | Potential Contact**† | $\alpha 2$ Other | $\alpha 2$ T | $\alpha 3$ | $\alpha 3$ | $\alpha 3$ |
|                | Mean % mm†*          | 0.33             | 0.10         | 0.31       | 0.31       | 0.24       |
| HLA-A families | HLA-A Specificity    |                  |              |            |            |            |
| A3             | A1                   | N                | A            | P          | P          | A          |
|                | A36                  | N                | A            | P          | P          | A          |
|                | A11                  | N                | A            | P          | P          | A          |
|                | A3                   | N                | A            | P          | P          | A          |
|                | A30                  | N                | A            | P          | P          | A          |
| A9             | A23                  | K                | A            | P          | P          | A          |
|                | A24                  | K                | A            | P          | P          | A          |
| A2             | A2                   | K                | A/T          | A          | A          | A          |
|                | A68                  | K                | A            | A          | A          | A          |
|                | A69                  | K                | A            | A          | A          | A          |
| A10            | A25                  | N                | T            | A          | A          | S          |
|                | A26                  | N                | T            | A          | A          | S          |
|                | A43                  | N                | T            | A          | A          | S          |
|                | A34                  | N                | T            | A          | A          | S          |
|                | A66                  | N                | T            | A          | A          | S          |
| A19            | A29                  | N                | A            | A          | A          | S          |
|                | A32                  | N                | A            | A          | A          | S          |
|                | A74                  | N                | A            | A          | A          | S          |
|                | A31                  | N                | A            | P          | A          | S          |
|                | A33                  | N                | A            | P          | A          | S          |
|                | A80                  | N                | A            | P          | P          | A          |

\*Amino acid sites are displayed based on the  $\alpha 1$ ,  $\alpha 2$ , and  $\alpha 2$  domains of the HLA-A molecule. T indicates a TCR contact site.

†Mean % mm indicates mean percent mismatches in this cohort of non-African American recipients.
